# Supplementary material for: Metagenomic analysis reveals significant changes of microbial compositions and protective functions during drinking water treatment
Source: PubMed Central journal article supplement — Sci Rep. 2013 Dec 19;3:3550. doi: 10.1038/srep03550 (PMC6506563; doi:10.1038/srep03550), 2013-12-19
Supplement: srep03550-s1.pdf [file srep03550-s1.pdf]

1  
2  
3  
4  
5  
6  
7  
8  
9  
10  
11  
12  
13  
14  
15  
16  
17  
18  
19  
20  
21  
22  
23

## Supporting Information

### For

#### Metagenomic analysis reveals significant changes of microbial compositions and protective functions during drinking water treatment

Yuanqing Chao,<sup>1</sup> Liping Ma,<sup>1</sup> Ying Yang,<sup>1</sup> Feng Ju,<sup>1</sup> Xu-Xiang Zhang,<sup>1,2</sup> Wei-Min Wu,<sup>3</sup> Tong Zhang<sup>\*,1</sup>

<sup>1</sup> Environmental Biotechnology Lab, The University of Hong Kong, Pokfulam Road, Hong Kong SAR, China

<sup>2</sup> State Key Laboratory of Pollution Control and Resource Reuse, School of the Environment, Nanjing University, Nanjing 210046, China

<sup>3</sup> Department of Civil and Environmental Engineering, Stanford University, Stanford, California 94305, United States

#### Table and Figure Legends:

**Table S1** Diversity evaluation (Chao and Shannon) of RW and TW samples at 0.03 and 0.06 cluster distances by RDP pipelines.

**Table S2** The basic information of 42 metagenomic data in four ecosystems (including soil, human faeces, activated sludge, and ocean), which were applied to principal component analysis in the present study.

---

\* Corresponding author. Email: zhangt@hku.hk. Phone: (852) 28598551. Fax: (852) 25595337.

24

25 **Table S3** Primers used for *gshA* and *gshB* amplification by qRT-PCR.

26

27 **Figure S1** Quality scores across all bases in Illumina reads of 5 metagenomes tested  
28 by using FastQC pipelines.

29

30 **Figure S2** Repeatability evaluation of two technical duplicates (RW12-1 and RW12-2)  
31 by Scatter plot. G-test was performed by using STAMP and corrected *q*-values  
32 (*p*-values) were calculated by using Benjamini-Hochberg's FDR approach.

33

34 **Figure S3** Percentage of microbial community in RW and TW at domain level  
35 classified by using all the annotation source databases on MG-RAST. The reads  
36 number which could be annotated by MG-RAST was taken as 100%.

37

38 **Figure S4** Percentage of bacterial rRNA reads in RW and TW at phylum level  
39 classified by using SILVA SSU database. The reads number which annotated to  
40 phylum level was taken as 100%. The phyla, which accounted for more than 1% of  
41 total rRNA reads in either RW or TW, were shown in the figure.

42

43 **Figure S5** Percentage of annotated reads in the major Level 1 subsystems (analyzed  
44 by SEED Subsystems) in RW and TW. The reads number which annotated as Level 1  
45 subsystems was taken as 100%. The asterisks showed the significant differences  
46 between RW and TW (one asterisk:  $P < 0.05$ ; two asterisks:  $P < 0.01$ ).

47

48 **Figure S6** Verification of metagenomic data by quantitative real-time PT-PCR  
49 analysis. Two glutathione synthesis genes, i.e. *gshA* (glutamate-cysteine ligase, EC  
50 6.3.2.2) and *gshB* (glutathione synthase, EC 6.3.2.3), were selected for PCR  
51 amplification. RW and TW samples in 6 months were applied. The PCR products were  
52 checked by gel electrophoresis (Figure S7). The asterisks showed the significant  
53 differences between RW and TW (one asterisk:  $P < 0.05$ ; two asterisks:  $P < 0.01$ ).

54

55 **Figure S7** Agarose gel electrophoresis of qRT-PCR products of *gshA* and *gshB* genes  
56 in RW and TW.

57

58 **Figure S8** The treatment processes of the drinking water treatment plant located at  
59 Pearl River Delta area.

60

61 **Figure S9** Bright field image (A) shows a fouling layer accumulated on the filter  
62 surface containing microorganisms (B) collected from DW samples. After  
63 ultrasonication, the majority of fouling layer (C) and microorganisms (D) on the filter  
64 had been effectively detached. The microorganisms on the filter (B & D) were stained  
65 by SYTO9 and visualized by CLSM using a 63× objective.

66

67 **Figure S10** The procedures of creating a sub-database derived from ARDB for  
68 sorting.

69 **Table S1** Diversity evaluation (Chao and Shannon) of 16S rRNA genes<sup>a</sup> in RW and  
 70 TW samples at 0.03 and 0.06 cluster distances by RDP pipelines.

| Samples        | 0.03        |             | 0.06        |             |
|----------------|-------------|-------------|-------------|-------------|
|                | Chao        | Shannon     | Chao        | Shannon     |
| RW             | 2,306 ± 100 | 7.4 ± 0.021 | 2,226 ± 98  | 7.3 ± 0.024 |
| TW             | 1,465 ± 257 | 6.0 ± 0.18  | 1,378 ± 250 | 6.0 ± 0.20  |
| <i>P</i> value | 0.012       | 0.001       | 0.011       | 0.001       |

71 <sup>a</sup> the 16S rRNA genes were extracted from the metagenomes according to the blast  
 72 results against the SILVA SSU database;

73

74 **Table S2** The basic information of 42 metagenomic data in four ecosystems (including soil, human faeces, activated sludge, and ocean), which  
 75 were applied to principal component analysis in the present study.

| Biomes         | MG-RAST ID | bp No.      | Reads No. | Location                                                                 | Sequencing Method  |
|----------------|------------|-------------|-----------|--------------------------------------------------------------------------|--------------------|
| Soil_1         | 4441091.3  | 154,475,569 | 138,347   | Farm in Waseca County, Minnesota, United States                          | sanger             |
| Soil_2         | 4445990.3  | 219,117,356 | 583,724   | Mercury, Nevada, United States                                           | 454                |
| Soil_3         | 4445994.3  | 254,548,462 | 683,082   | Mercury, Nevada, United States                                           | 454                |
| Soil_4         | 4445993.3  | 133,555,260 | 352,417   | Mercury, Nevada, United States                                           | 454                |
| Soil_5         | 4445996.3  | 116,821,792 | 312,444   | Mercury, Nevada, United States                                           | 454                |
| Soil_6         | 4446153.3  | 322,213,082 | 782,404   | subtropical lower montane wet forest in the Luquillo forest, Puerto Rico | 454                |
| Soil_7         | 4443231.3  | 440,390,760 | 1,103,048 | Eureka, Canada                                                           | 454                |
| Soil_8         | 4443232.3  | 413,050,687 | 1,024,347 | Eureka, Canada                                                           | 454                |
| Soil_9         | 4450750.3  | 87,160,647  | 239,933   | Nevada, United States                                                    | 454                |
| Soil_10        | 4450752.3  | 76,860,743  | 233,279   | Nevada, United States                                                    | 454                |
| Soil_11        | 4451103.3  | 397,257,248 | 1,040,697 | Nevada, United States                                                    | 454                |
| Soil_12        | 4451104.3  | 347,578,191 | 998,484   | Nevada, United States                                                    | 454                |
| Human Faeces_1 | 4440943.3  | 40,076,128  | 30,198    | Japan                                                                    | other <sup>a</sup> |
| Human Faeces_2 | 4440949.3  | 25,941,797  | 16,164    | Japan                                                                    | other              |

|                     |           |               |            |                                              |          |
|---------------------|-----------|---------------|------------|----------------------------------------------|----------|
| Human Faeces_3      | 4440944.3 | 39,071,077    | 31,237     | Japan                                        | other    |
| Human Faeces_4      | 4440946.3 | 29,296,224    | 20,226     | Japan                                        | other    |
| Human Faeces_5      | 4440941.3 | 43,259,070    | 36,326     | Japan                                        | other    |
| Human Faeces_6      | 4440947.3 | 45,480,292    | 35,177     | Japan                                        | other    |
| Human Faeces_7      | 4440948.3 | 46,397,089    | 37,296     | Japan                                        | other    |
| Human Faeces_8      | 4440951.3 | 43,473,860    | 34,797     | Japan                                        | other    |
| Human Faeces_9      | 4440942.3 | 45,906,118    | 36,455     | Japan                                        | other    |
| Human Faeces_10     | 4440950.3 | 27,208,886    | 20,532     | Japan                                        | other    |
| Activated sludge_1  | 4489206.3 | 2,561,651,200 | 25,616,512 | Shatin wastewater treatment plant, Hong Kong | Illumina |
| Activated sludge_2  | 4489205.3 | 2,561,651,200 | 25,616,512 | Shatin wastewater treatment plant, Hong Kong | Illumina |
| Activated sludge_3  | 4489073.3 | 2,561,357,900 | 25,613,579 | Shatin wastewater treatment plant, Hong Kong | Illumina |
| Activated sludge_4  | 4489072.3 | 2,542,600,100 | 25,426,001 | Shatin wastewater treatment plant, Hong Kong | Illumina |
| Activated sludge_5  | 4487666.3 | 2,564,795,000 | 25,647,950 | Shatin wastewater treatment plant, Hong Kong | Illumina |
| Activated sludge_6  | 4487665.3 | 2,564,795,000 | 25,647,950 | Shatin wastewater treatment plant, Hong Kong | Illumina |
| Activated sludge_7  | 4489245.3 | 2,560,000,000 | 25,600,000 | Shatin wastewater treatment plant, Hong Kong | Illumina |
| Activated sludge_8  | 4487697.3 | 2,563,286,700 | 25,632,867 | Shatin wastewater treatment plant, Hong Kong | Illumina |
| Activated sludge_9  | 4487700.3 | 2,563,286,700 | 25,632,867 | Shatin wastewater treatment plant, Hong Kong | Illumina |
| Activated sludge_10 | 4488258.3 | 2,560,000,000 | 25,600,000 | Shatin wastewater treatment plant, Hong Kong | Illumina |
| Ocean_1             | 4441148.3 | 54,752,102    | 50,609     | Indian Ocean, St. Anne Island, Seychelles    | other    |

|          |           |            |        |                                                                        |       |
|----------|-----------|------------|--------|------------------------------------------------------------------------|-------|
| Ocean_2  | 4441139.4 | 52,667,848 | 50,096 | Indian Ocean, International waters between Madagascar and South Africa | other |
| Ocean_3  | 4441150.3 | 64,230,062 | 61,020 | Indian Ocean                                                           | other |
| Ocean_4  | 4441155.3 | 62,752,349 | 59,813 | Indian Ocean                                                           | other |
| Ocean_5  | 4441608.3 | 53,607,277 | 49,597 | Indian Ocean                                                           | other |
| Ocean_6  | 4441135.3 | 45,710,196 | 46,052 | Indian Ocean, Madagascar Waters, Madagascar                            | other |
| Ocean_7  | 4441149.3 | 64,223,447 | 60,932 | Outside Seychelles, Indian Ocean, Seychelles                           | other |
| Ocean_8  | 4441147.3 | 55,638,894 | 52,118 | Indian Ocean                                                           | other |
| Ocean_9  | 4441156.3 | 62,072,289 | 59,080 | Indian Ocean                                                           | other |
| Ocean_10 | 4441134.3 | 53,607,277 | 49,597 | Indian Ocean                                                           | other |

76 <sup>a</sup> indicates the researchers applied other sequencing method, except for sanger, Illumina and 454 methods.

77 **Table S3** Primers used for *gshA* and *gshB* amplification by qRT-PCR.

| Target genes | Primers <sup>a</sup> | Sequences (5'-3')     |
|--------------|----------------------|-----------------------|
| <i>gshA</i>  | gshA_F               | GGCGGCGAAGCGTATCAGAAA |
|              | gshA_R               | AATGCTTTGCCTGTTCCGCCA |
| <i>gshB</i>  | gshB_F               | CGTGATTGCCGAAACCCTGA  |
|              | gshB_R               | GCCAGATTGCCACGGGTTTC  |

78 <sup>a</sup> **Reference:** Helbig, K., Grosse, C., & Nies, D. H. Cadmium toxicity in glutathione

79 mutants of *Esherichia coli*. *J. Bacteriol.* **190**, 5439-5454 (2008).



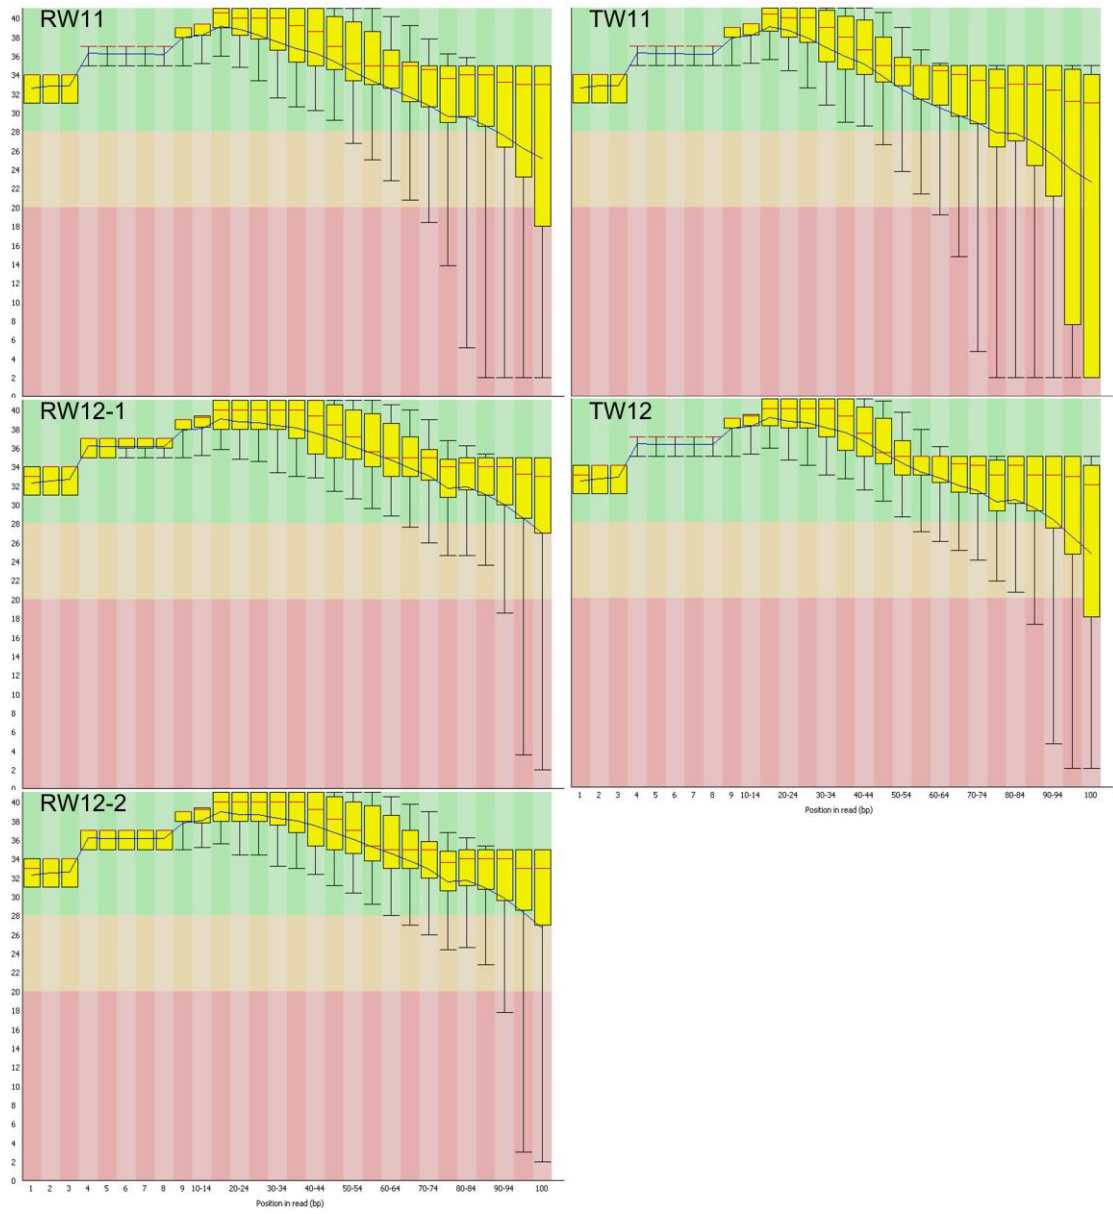

80

81 **Figure S1** Quality scores across all bases in Illumina reads of 5 metagenomes tested  
 82 by using FastQC pipelines.

83

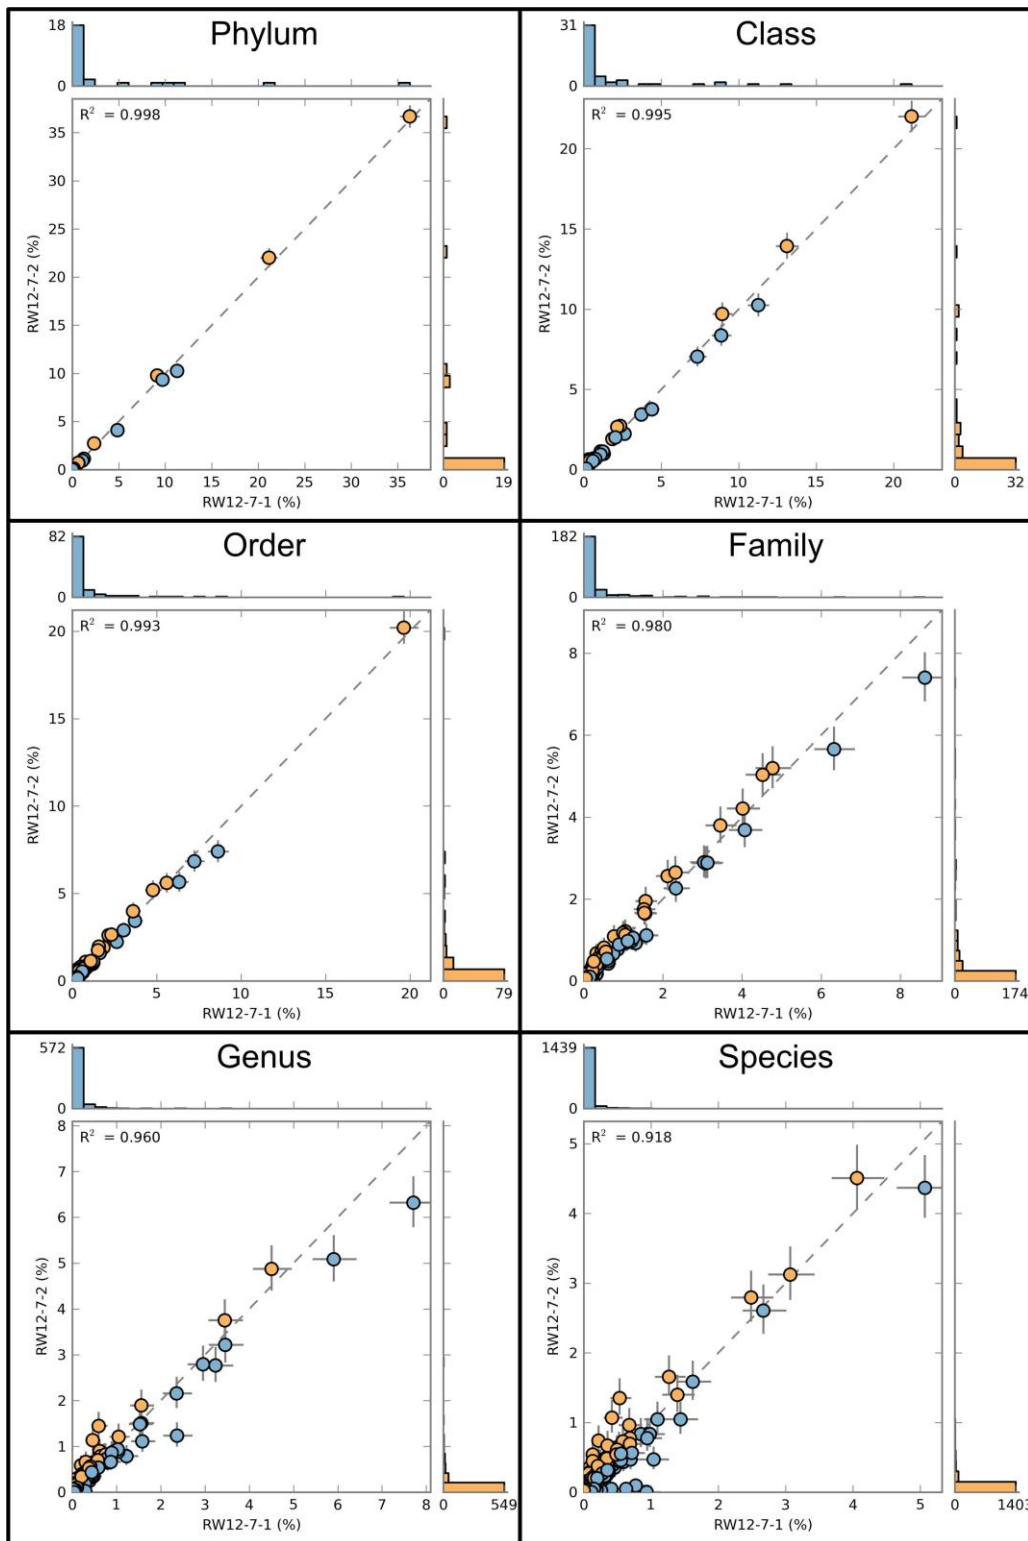

84

85 **Figure S2** Repeatability evaluation of two technical duplicates (RW12-1 and RW12-2)

86 by Scatter plot. G-test was performed by using STAMP and corrected  $q$ -values

87 ( $p$ -values) were calculated by using Benjamini-Hochberg's FDR approach.

88

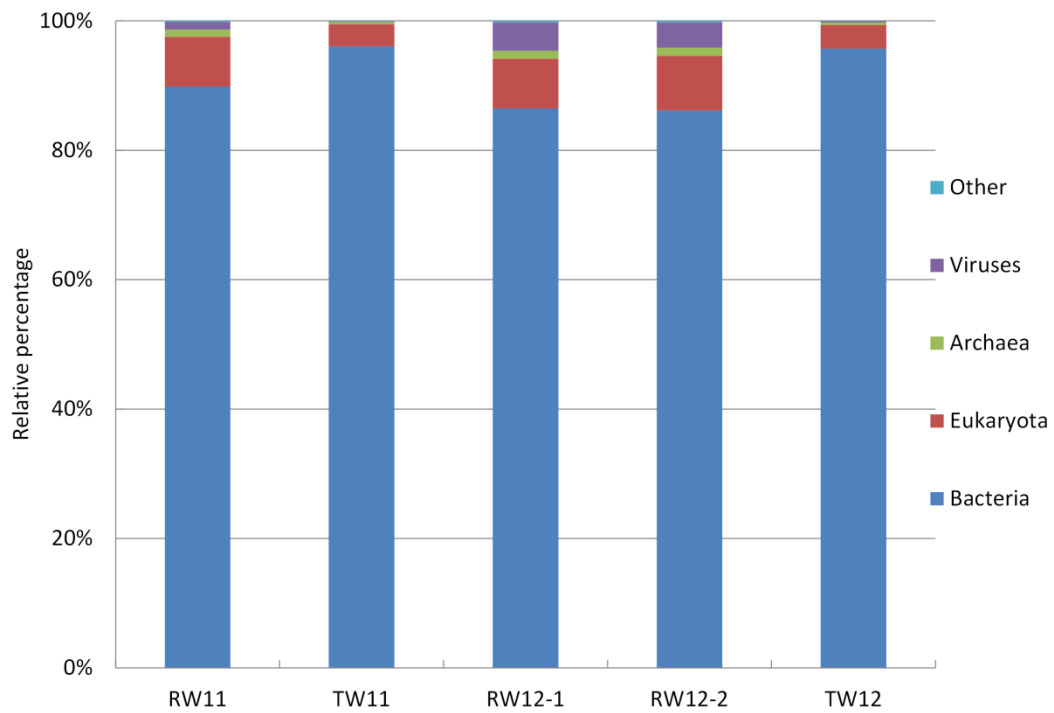

89

90 **Figure S3** Percentage of microbial community in RW and TW at domain level

91 classified by using all the annotation source databases on MG-RAST. The reads

92 number which could be annotated by MG-RAST was taken as 100%.

93

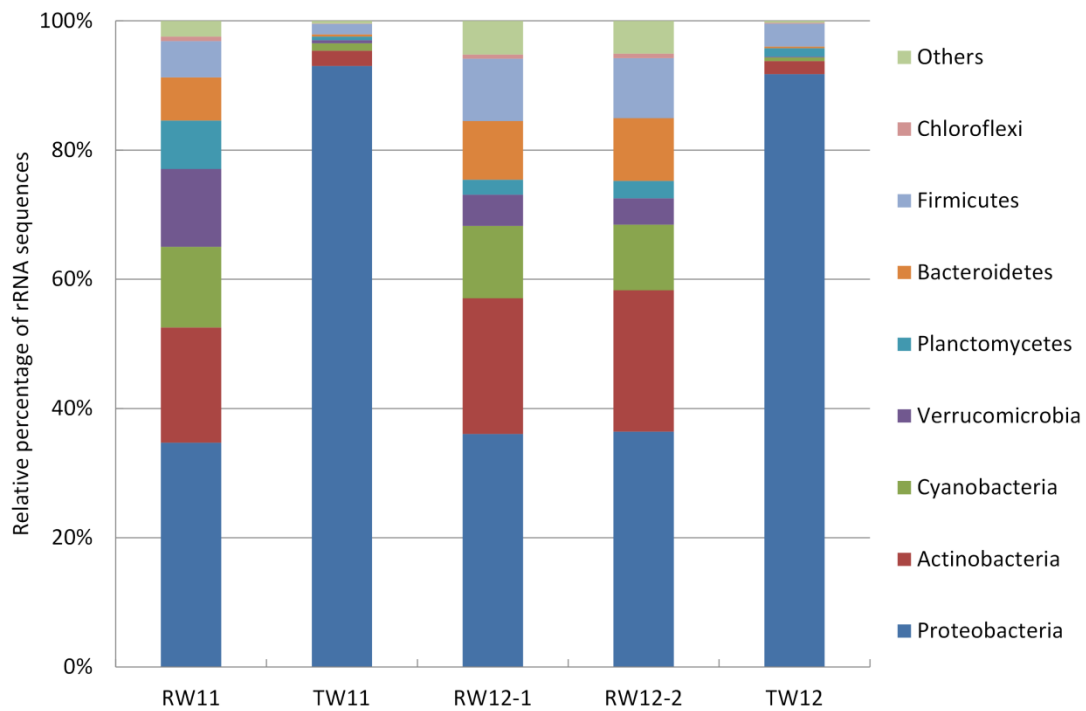

94

95 **Figure S4** Percentage of bacterial rRNA reads in RW and TW at phylum level  
 96 classified by using SILVA SSU database. The reads number which annotated to  
 97 phylum level was taken as 100%. The phyla, which accounted for more than 1% of  
 98 total rRNA reads in either RW or TW, were shown in the figure.

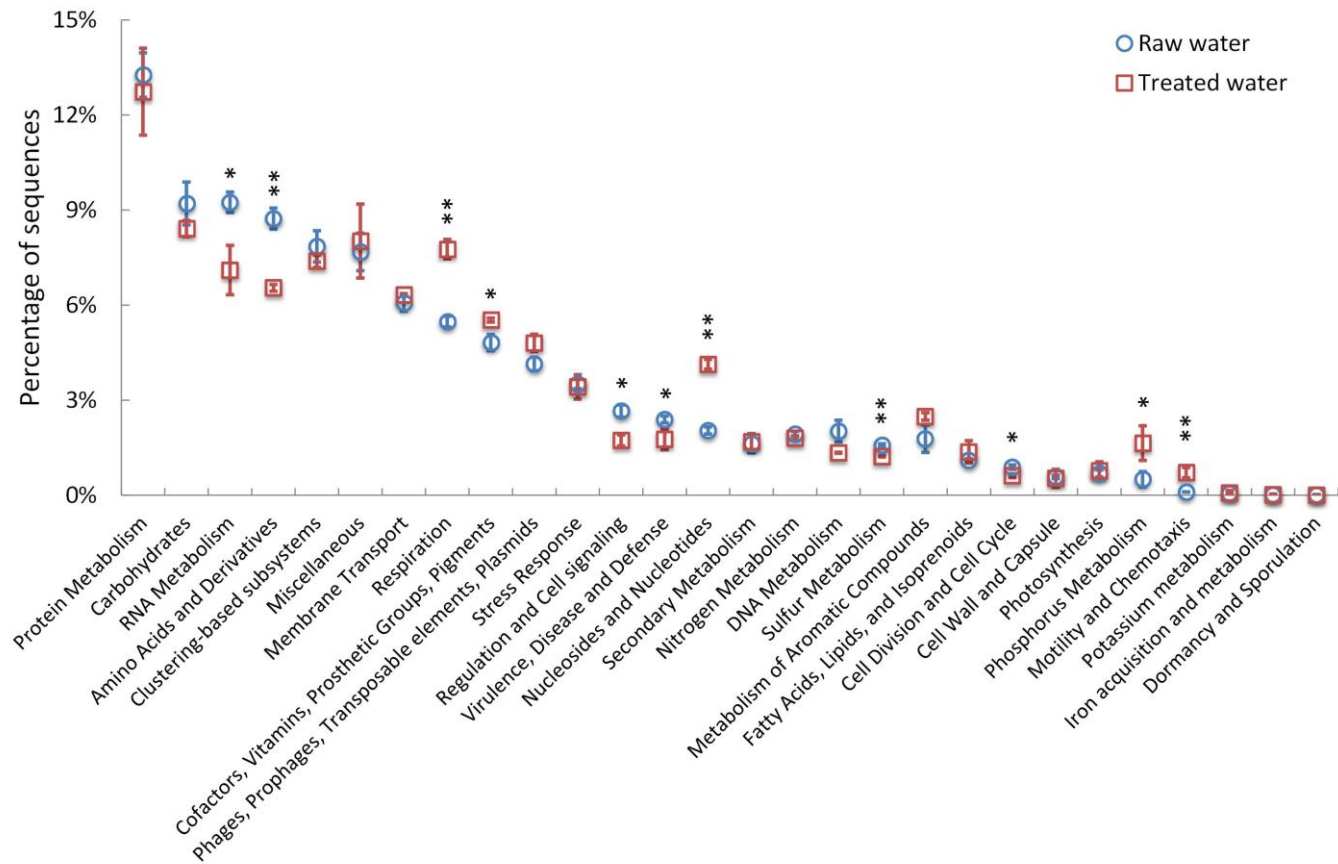

99

100 **Figure S5** Percentage of annotated reads in the major Level 1 subsystems (analyzed by SEED Subsystems) in RW and TW. The reads number  
 101 which annotated as Level 1 subsystems was taken as 100%. The asterisks showed the significant differences between RW and TW (one asterisk:  
 102  $P < 0.05$ ; two asterisks:  $P < 0.01$ ).

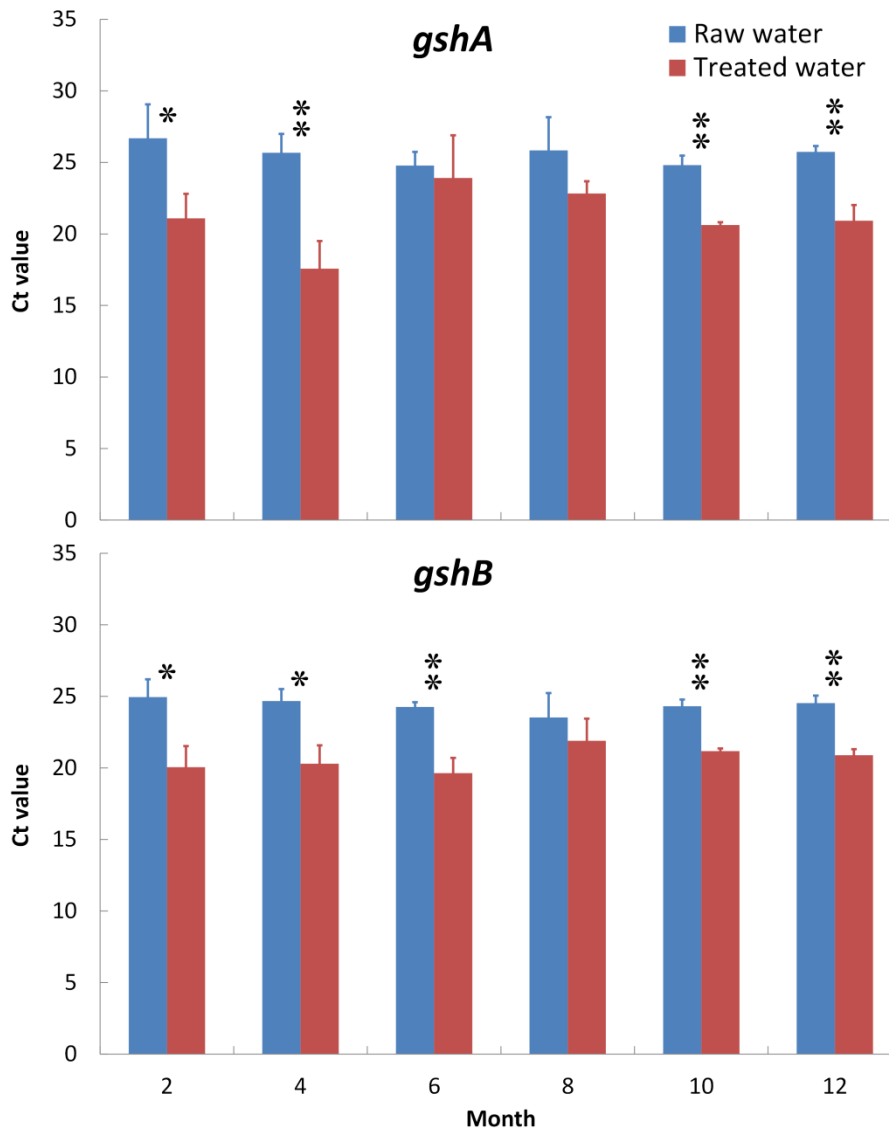

103

104 **Figure S6** Verification of metagenomic data by quantitative real-time PT-PCR  
 105 analysis. Two glutathione synthesis genes, i.e. *gshA* (glutamate-cysteine ligase, EC  
 106 6.3.2.2) and *gshB* (glutathione synthase, EC 6.3.2.3), were selected for PCR  
 107 amplification. RW and TW samples in 6 months were applied. The PCR products were  
 108 checked by gel electrophoresis (Figure S7). The asterisks showed the significant  
 109 differences between RW and TW (one asterisk:  $P < 0.05$ ; two asterisks:  $P < 0.01$ ).

110

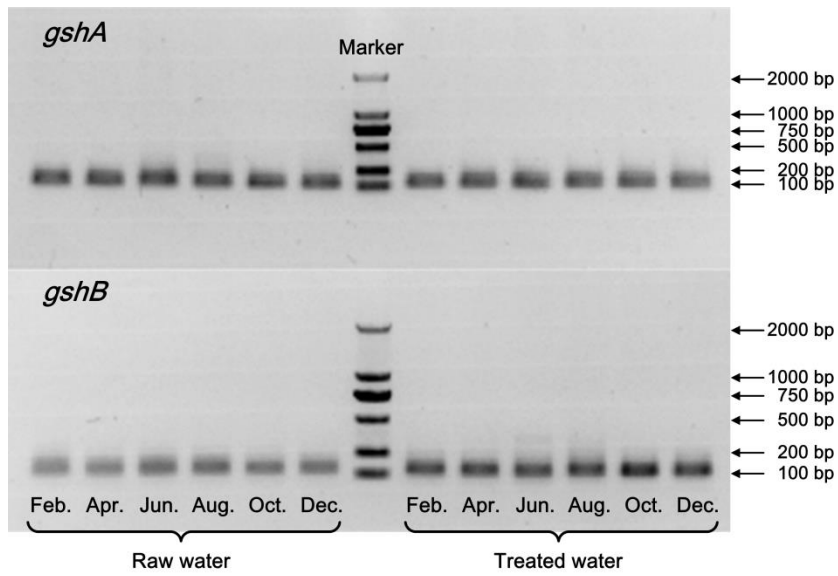

111

112 **Figure S7** Agarose gel electrophoresis of qRT-PCR products of *gshA* and *gshB* genes

113 in RW and TW.

114

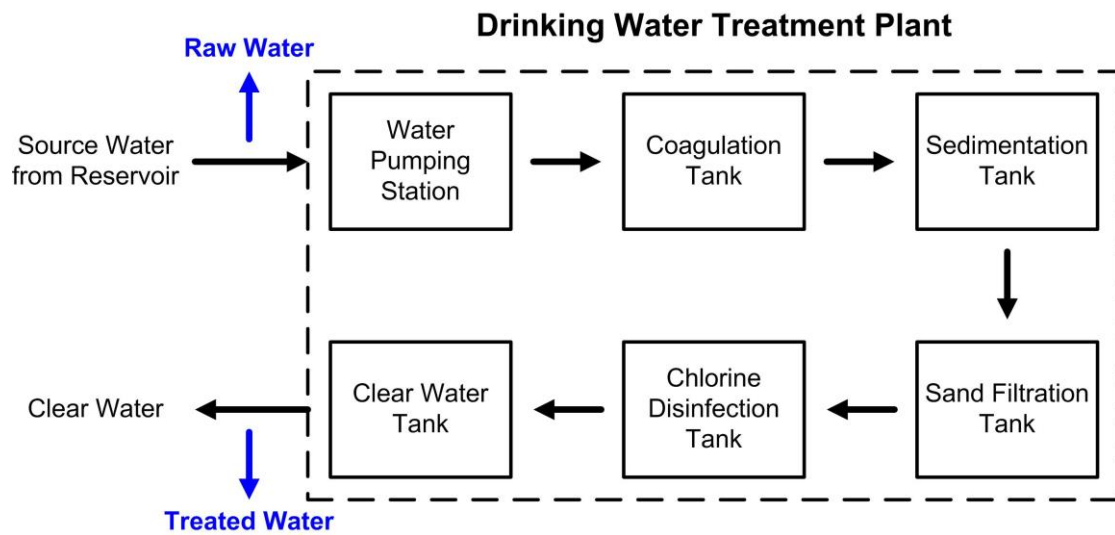

115

116 **Figure S8** The treatment processes of the drinking water treatment plant located at

117 Pearl River Delta area.

118



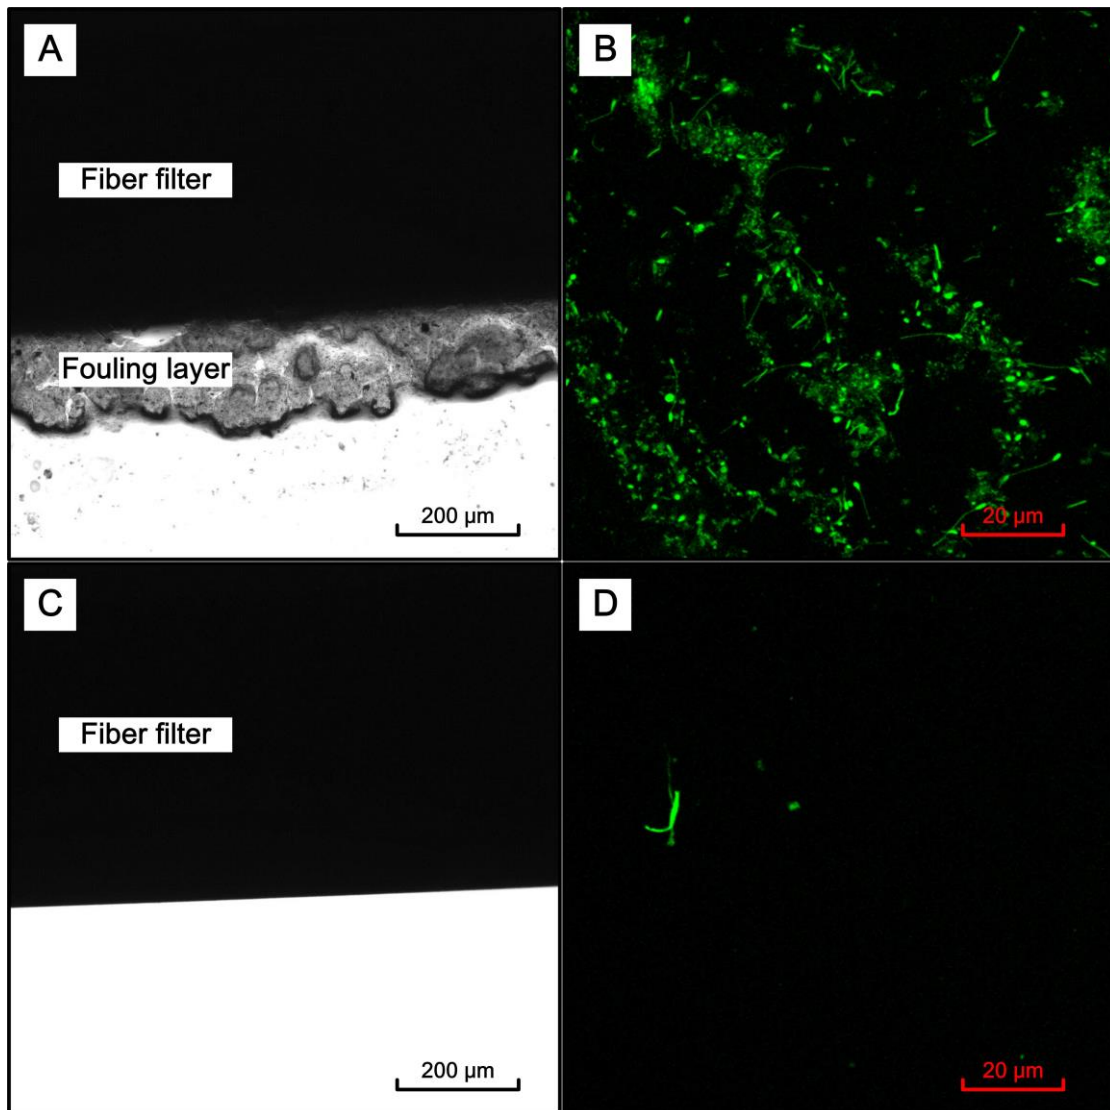

119

120 **Figure S9** Bright field image (A) shows a fouling layer accumulated on the filter  
121 surface containing microorganisms (B) collected from DW samples. After  
122 ultrasonication, the majority of fouling layer (C) and microorganisms (D) on the filter  
123 had been effectively detached. The microorganisms on the filter (B & D) were stained  
124 by SYTO9 and visualized by CLSM using a 63× objective.

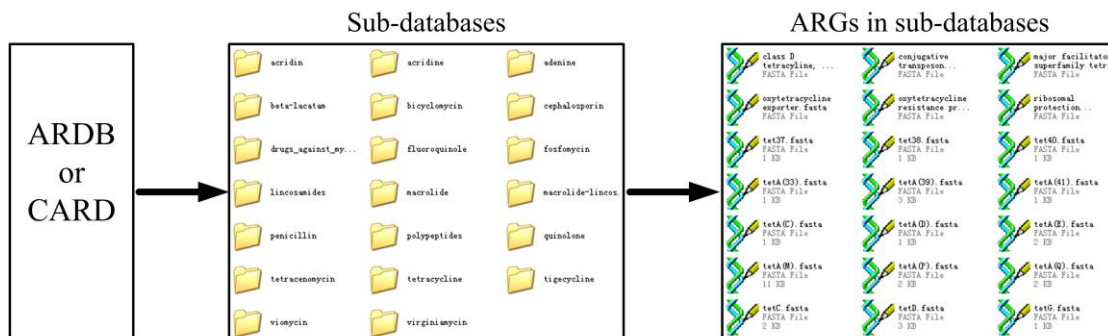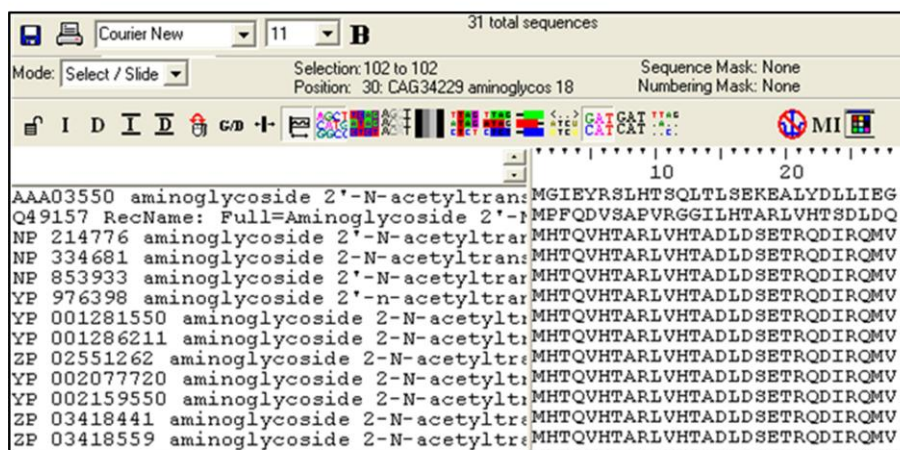

Extracted ARGs sequences

125

126 **Figure S10** The procedures of creating a sub-database derived from ARDB for

127 sorting.
